# Supplementary material for: Sample size used to validate a scale: a review of publications on newly-developed patient reported outcomes measures
Source: Springer Nature journal article supplement (doi:10.1186/s12955-014-0176-2), 2014-12-01
Supplement: MOESM2 [file 9763892]

## How many individuals are used to validate a scale? A review of publications on newly-developed patient reported outcomes measures

Emmanuelle Anthoine, Leïla Moret, Antoine Regnault, Véronique Sébille, Jean-Benoît Hardouin

### Practices of the psychometric properties' evaluation

Table 1: Information collected in articles

|                               |                                                                                                                                                                                                                                                                                                                                                  |
|-------------------------------|--------------------------------------------------------------------------------------------------------------------------------------------------------------------------------------------------------------------------------------------------------------------------------------------------------------------------------------------------|
| 1 – General information       | Title, country, journal, kind of journal, impact factor and year of publication                                                                                                                                                                                                                                                                  |
| 2 – Study and scale           | Concept of interest, primary psychometric validation study of the scale: main or ancillary objective of the study.<br>Language of the scale development, number of items, number of factors, number of items per factor, kind of measurement scale, computation of a global score, computation of a score per factor, generic or specific scale. |
| 3 – Sample size determination | How was sample size determined? How was it computed?<br>References used and authors' comments on the sample size in the discussion.                                                                                                                                                                                                              |
| 4 – Item distribution         | Computation of missing value rates, how missing values are handled? Were Items eliminated when missing values rate was high? How high? Distribution of items or scores, ceiling and floor effects of items or scores.                                                                                                                            |
| 5 – Psychometric properties   | Content validity, face validity, construct validity (known group validity, convergent validity, divergent validity), reliability (internal consistency and repeatability), criterion validity (concurrent validity and predictive validity), responsiveness and Item Response Theory (IRT) model.                                                |

Table 2: Distribution of scores and items responses

|                                                         |                                                                  |
|---------------------------------------------------------|------------------------------------------------------------------|
| <i>n</i> = 114                                          |                                                                  |
| Evaluation of ceiling and floor effect                  | 35.1% (40)                                                       |
| Displaying of items or scores distribution              | 61.4% (70)                                                       |
| Description of items or scores missing value rate       | 21.9% (25)                                                       |
| Elimination of items based on missing value rate (n=25) | 32% (8)                                                          |
|                                                         | Mean missing value rate* (SD); range<br>18% (7.9%) ; [10% ; 33%] |

Data are percentages (n) and otherwise indicated. \*Mean of the threshold used to eliminate the items.

Table 3: Scoring

| <i>n</i> = 114      |                                                      |            |
|---------------------|------------------------------------------------------|------------|
| Score per dimension | Yes                                                  | 65.8% (75) |
|                     | No                                                   | 12.3% (14) |
|                     | Not applicable (unidimensional scale)                | 21.9% (25) |
| Scoring             | Sum                                                  | 33.3% (38) |
|                     | Mean                                                 | 8.8% (10)  |
|                     | Linear transformation (between 0 and 1 or 10 or 100) | 14.0% (16) |
|                     | Not mentioned                                        | 43.8% (50) |

Table 4: Assessment of validity

| <i>n</i> = 114                           |                                       |                              |
|------------------------------------------|---------------------------------------|------------------------------|
| <b>Content validity*</b>                 |                                       | 94.7% (108)                  |
| Literature review (n=97)                 |                                       | 75.2% (73)                   |
| Patient focus group (n = 97)             |                                       | 22.7% (22)                   |
| Sample size                              | Mean (SD) ; Median ; range            | 36.7 (27.4) ; 30 ; [10 ; 98] |
| Patient Interviews (n = 97)              |                                       | 37.1% (36)                   |
| Sample size                              | Mean (SD) ; Median ; range            | 37.6 (76.5) ; 22 ; [7 ; 422] |
| Experts (n=97)                           |                                       | 78.3% (76)                   |
| <b>Face validity*</b>                    |                                       | 65.8% (75)                   |
| Pilot testing on a small sample (n = 70) |                                       | 100% (70)                    |
| Sample size                              | Mean (SD) ; Median ; range            | 54.2 (97.9) ; 20 ; [3 ; 603] |
| Understanding of items (n=70)            |                                       | 97.1% (68)                   |
| Item refinement (n = 70)                 |                                       | 85.7% (60)                   |
| <b>Criterion validity*</b>               |                                       | 70.2% (80)                   |
| Concurrent validity (n=80)               |                                       | 98.7% (79)                   |
| Predictive validity (n=80)               |                                       | 3.7% (3)                     |
| <b>Construct validity*</b>               |                                       | 90.3% (103)                  |
| Convergent validity (n = 103)            |                                       | 84.5% (87)                   |
| Divergent validity (n = 103)             | Yes                                   | 17.5% (18)                   |
|                                          | No                                    | 63.1% (65)                   |
|                                          | Not applicable (unidimensional scale) | 19.4% (20)                   |
| Known-group validity (n = 103)           |                                       | 57.3% (59)                   |
| Exploratory factor analysis (n = 103)    |                                       | 79.6% (82)                   |
| Confirmatory factor analysis (n = 103)   |                                       | 15.5% (16)                   |
| <b>IRT model</b>                         |                                       | 14.0% (16)                   |
|                                          | Rasch modelling                       | 12.2% (14)                   |
|                                          | Other                                 | 1.7% (2)                     |

Data are percentages (n) and otherwise indicated. \*At least one aspect of a measurement property evaluating content, face, criterion or construct validity.

Table 5: Exploratory and confirmatory factor analysis

| <i>n = 103</i>                        |                                                                              |                                |
|---------------------------------------|------------------------------------------------------------------------------|--------------------------------|
| <b>Exploratory factor analysis</b>    |                                                                              | 79.6% (82)                     |
| Threshold factor loadings<br>(n = 82) | > 0.4 without considering cross loadings                                     | 25.6% (21)                     |
|                                       | > another threshold (between 0.3 and 0.6) without considering cross loadings | 23.2% (19)                     |
|                                       | Considering cross loadings                                                   | 19.5% (16)                     |
|                                       | Not mentioned                                                                | 31.7% (26)                     |
| Rotation<br>(n = 82)                  | Varimax                                                                      | 53.7% (44)                     |
|                                       | Promax                                                                       | 12.2% (10)                     |
|                                       | Other                                                                        | 15.9% (13)                     |
|                                       | None or not mentioned                                                        | 18.2% (15)                     |
|                                       | Method justified (n=67)                                                      | 22.4% (15)                     |
| % global variance explained           | Mean (SD) ; Median ; range                                                   | 61.1 (12.0) ; 61 ; [32.5 ; 88] |
| <b>Confirmatory factor analysis</b>   |                                                                              | 15.5% (16)                     |
| Definition of the structure<br>(n=16) | EFA                                                                          | 87.5% (14)                     |
|                                       | Qualitative analysis                                                         | 12.5% (2)                      |
| Fit indices*<br>(n=16)                | RMSEA                                                                        | 93.7% (15)                     |
|                                       | CFI                                                                          | 81.2% (13)                     |
|                                       | Khi2                                                                         | 75.0% (12)                     |
|                                       | TLI                                                                          | 43.7% (7)                      |
|                                       | SRMR                                                                         | 31.2% (5)                      |
|                                       | GFI                                                                          | 31.2% (5)                      |
|                                       | AGFI                                                                         | 31.2% (5)                      |
|                                       | Other                                                                        | 100.0%(16)                     |

Data are percentages (n) and otherwise indicated. \*Several coefficients could be used.

Table 6: Assessment of reliability and responsiveness

| <i>n = 114</i>                                   |                            |                          |
|--------------------------------------------------|----------------------------|--------------------------|
| <b>Repeatability</b>                             |                            | 60.5% (69)               |
| Sample size                                      | Mean (SD) ; Median ; range | 85 (86) ; 53 ; [8 ; 491] |
| Determination of the required sample size (n=69) |                            | 0.0% (0)                 |
| Coefficient*<br>(n = 69)                         | ICC                        | 52.2% (36)               |
|                                                  | Correlation coefficient    | 49.3% (34)               |
|                                                  | Paired t test              | 10.1% (7)                |
|                                                  | Other                      | 11.6% (8)                |
| <b>Internal consistency</b>                      |                            | 89.5% (102)              |
| Coefficient*<br>(n = 102)                        | Cronbach alpha             | 95.1% (97)               |
|                                                  | Inter item correlation     | 10.8% (11)               |
|                                                  | Split half                 | 6.8% (7)                 |
|                                                  | Other                      | 5.9% (6)                 |
| <b>Responsiveness</b>                            |                            | 10.5% (12)               |
| Coefficient*<br>(n = 12)                         | Paired t test              | 75.0% (9)                |
|                                                  | Effect Size                | 25.0% (3)                |
|                                                  | Standarized Response Mean  | 16.7% (2)                |
|                                                  | Responsiveness statistic   | 0.0% (0)                 |
|                                                  | Other                      | 16.7% (2)                |

Data are percentages (n) and otherwise indicated. \*Several coefficients could be used.
